# Supplementary material for: From raw data to data-analysis for magnetic resonance spectroscopy – the missing link: jMRUI2XML
Source: Springer Nature journal article supplement (doi:10.1186/s12859-015-0796-5), 2015-11-09
Supplement: 12859_2015_796_MOESM1_ESM.pdf [file 12859_2015_796_MOESM1_ESM.pdf]

element **DATASET**

| diagram                   |                                                                                                                                                                                                                                                                                                                                                                                                                                                                                                                                                                                                                                                                                                    |          |         |       |            |       |            |                           |           |          |  |  |  |                      |         |          |  |  |  |                         |           |          |  |  |  |
|---------------------------|----------------------------------------------------------------------------------------------------------------------------------------------------------------------------------------------------------------------------------------------------------------------------------------------------------------------------------------------------------------------------------------------------------------------------------------------------------------------------------------------------------------------------------------------------------------------------------------------------------------------------------------------------------------------------------------------------|----------|---------|-------|------------|-------|------------|---------------------------|-----------|----------|--|--|--|----------------------|---------|----------|--|--|--|-------------------------|-----------|----------|--|--|--|
| namespace                 | http://gabrmn.uab.es/jmruixml_sv                                                                                                                                                                                                                                                                                                                                                                                                                                                                                                                                                                                                                                                                   |          |         |       |            |       |            |                           |           |          |  |  |  |                      |         |          |  |  |  |                         |           |          |  |  |  |
| properties                | content complex                                                                                                                                                                                                                                                                                                                                                                                                                                                                                                                                                                                                                                                                                    |          |         |       |            |       |            |                           |           |          |  |  |  |                      |         |          |  |  |  |                         |           |          |  |  |  |
| children                  | <a href="#">sv:Preprocessing</a> <a href="#">sv:Voxel</a> <a href="#">sv:Grid</a>                                                                                                                                                                                                                                                                                                                                                                                                                                                                                                                                                                                                                  |          |         |       |            |       |            |                           |           |          |  |  |  |                      |         |          |  |  |  |                         |           |          |  |  |  |
| attributes                | <table border="1"> <thead> <tr> <th>Name</th> <th>Type</th> <th>Use</th> <th>Default</th> <th>Fixed</th> <th>Annotation</th> </tr> </thead> <tbody> <tr> <td><a href="#">CreatedBy</a></td> <td>xs:string</td> <td>required</td> <td></td> <td></td> <td></td> </tr> <tr> <td><a href="#">Date</a></td> <td>xs:date</td> <td>required</td> <td></td> <td></td> <td></td> </tr> <tr> <td><a href="#">Version</a></td> <td>xs:string</td> <td>required</td> <td></td> <td></td> <td></td> </tr> </tbody> </table>                                                                                                                                                                                    | Name     | Type    | Use   | Default    | Fixed | Annotation | <a href="#">CreatedBy</a> | xs:string | required |  |  |  | <a href="#">Date</a> | xs:date | required |  |  |  | <a href="#">Version</a> | xs:string | required |  |  |  |
| Name                      | Type                                                                                                                                                                                                                                                                                                                                                                                                                                                                                                                                                                                                                                                                                               | Use      | Default | Fixed | Annotation |       |            |                           |           |          |  |  |  |                      |         |          |  |  |  |                         |           |          |  |  |  |
| <a href="#">CreatedBy</a> | xs:string                                                                                                                                                                                                                                                                                                                                                                                                                                                                                                                                                                                                                                                                                          | required |         |       |            |       |            |                           |           |          |  |  |  |                      |         |          |  |  |  |                         |           |          |  |  |  |
| <a href="#">Date</a>      | xs:date                                                                                                                                                                                                                                                                                                                                                                                                                                                                                                                                                                                                                                                                                            | required |         |       |            |       |            |                           |           |          |  |  |  |                      |         |          |  |  |  |                         |           |          |  |  |  |
| <a href="#">Version</a>   | xs:string                                                                                                                                                                                                                                                                                                                                                                                                                                                                                                                                                                                                                                                                                          | required |         |       |            |       |            |                           |           |          |  |  |  |                      |         |          |  |  |  |                         |           |          |  |  |  |
| annotation                | documentation<br>Root element                                                                                                                                                                                                                                                                                                                                                                                                                                                                                                                                                                                                                                                                      |          |         |       |            |       |            |                           |           |          |  |  |  |                      |         |          |  |  |  |                         |           |          |  |  |  |
| source                    | <pre> &lt;xs:element name="DATASET"&gt;   &lt;xs:annotation&gt;     &lt;xs:documentation&gt;Root element&lt;/xs:documentation&gt;   &lt;/xs:annotation&gt;   &lt;xs:complexType&gt;     &lt;xs:sequence&gt;       &lt;xs:element name="Preprocessing"&gt;         &lt;xs:complexType&gt;           &lt;xs:sequence&gt;             &lt;xs:element name="SetRefernce" type="xs:double" minOccurs="0"/&gt;             &lt;xs:element name="Apodization" minOccurs="0"&gt;               &lt;xs:complexType&gt;                 &lt;xs:choice&gt;                   &lt;xs:element name="Lorentzian"&gt;                     &lt;xs:complexType&gt;                       &lt;xs:sequence&gt; </pre> |          |         |       |            |       |            |                           |           |          |  |  |  |                      |         |          |  |  |  |                         |           |          |  |  |  |

```

        <xs:element name="Hz" type="xs:integer"/>
    </xs:sequence>
</xs:complexType>
</xs:element>
<xs:element name="Gaussian">
    <xs:complexType>
        <xs:sequence>
            <xs:element name="Hz" type="xs:integer"/>
        </xs:sequence>
    </xs:complexType>
</xs:element>
</xs:choice>
</xs:complexType>
</xs:element>
<xs:element name="WaterFiltering" minOccurs="0">
    <xs:complexType>
        <xs:sequence>
            <xs:element name="NumberOfLorentzians" type="xs:integer"/>
            <xs:sequence maxOccurs="3">
                <xs:element name="MinPPM" type="xs:double"/>
                <xs:element name="MaxPPM" type="xs:double"/>
            </xs:sequence>
        </xs:sequence>
    </xs:complexType>
</xs:element>
<xs:element name="BaselineCorrection" minOccurs="0">
    <xs:complexType>
        <xs:sequence maxOccurs="3">
            <xs:element name="MinPPM" type="xs:double"/>
            <xs:element name="MaxPPM" type="xs:double"/>
        </xs:sequence>
    </xs:complexType>
</xs:element>
<xs:element name="NumberOfPoints" minOccurs="0">
    <xs:complexType>
        <xs:sequence>
            <xs:element name="NrPoints" type="xs:integer"/>
            <xs:element name="MinPPM" type="xs:double"/>
            <xs:element name="MaxPPM" type="xs:double"/>
        </xs:sequence>
    </xs:complexType>
</xs:element>
<xs:element name="SetToUnitLength" type="xs:boolean" minOccurs="0"/>
<xs:element name="AlignmentCorrection" minOccurs="0">
    <xs:complexType>
        <xs:sequence>
            <xs:element name="isBrainH" type="xs:boolean"/>
            <xs:element name="minSNR" type="xs:double"/>
            <xs:element name="minSTD" type="xs:double"/>
            <xs:element name="maxSTD" type="xs:double"/>
            <xs:element name="firstPeak" type="xs:double"/>
            <xs:element name="secondPeak" type="xs:double" minOccurs="0"/>
            <xs:element name="thirdPeak" type="xs:double" minOccurs="0"/>
        </xs:sequence>
    </xs:complexType>
</xs:element>

```

```

</xs:complexType>
</xs:element>
<xs:element name="AdditionalInformation">
  <xs:complexType>
    <xs:sequence>
      <xs:element name="Name" type="xs:string"/>
      <xs:element name="Place" type="xs:string"/>
      <xs:element name="Keywords" type="xs:string" minOccurs="0"/>
      <xs:element name="Observations" type="xs:string" minOccurs="0"/>
    </xs:sequence>
  </xs:complexType>
</xs:element>
</xs:sequence>
</xs:complexType>
</xs:element>
<xs:choice>
  <xs:element name="Voxel">
    <xs:complexType>
      <xs:sequence>
        <xs:element name="Tissue">
          <xs:complexType>
            <xs:attribute name="Type" type="xs:string"/>
          </xs:complexType>
        </xs:element>
        <xs:element name="Spectrum"/>
      </xs:sequence>
      <xs:attribute name="FirstPPM" type="xs:double" use="required"/>
      <xs:attribute name="LastPPM" type="xs:double" use="required"/>
      <xs:attribute name="NumberOfPoints" type="xs:integer" use="required"/>
      <xs:attribute name="SNR" type="xs:double"/>
    </xs:complexType>
  </xs:element>
  <xs:element name="Grid">
    <xs:complexType>
      <xs:sequence>
        <xs:element name="Voxel" maxOccurs="unbounded">
          <xs:complexType>
            <xs:sequence>
              <xs:element name="Tissue">
                <xs:complexType>
                  <xs:attribute name="Type" type="xs:string"/>
                </xs:complexType>
              </xs:element>
              <xs:element name="Spectrum"/>
            </xs:sequence>
            <xs:attribute name="FirstPPM" type="xs:double" use="required"/>
            <xs:attribute name="LastPPM" type="xs:double" use="required"/>
            <xs:attribute name="NumberOfPoints" type="xs:integer" use="required"/>
            <xs:attribute name="Xaxis" type="xs:integer" use="required"/>
            <xs:attribute name="Yaxis" type="xs:integer" use="required"/>
            <xs:attribute name="Zaxis" type="xs:integer" use="required"/>
            <xs:attribute name="SNR" type="xs:double"/>
          </xs:complexType>
        </xs:element>

```

|  |                                                                                                                                                                                                                                                                                                                                                                               |
|--|-------------------------------------------------------------------------------------------------------------------------------------------------------------------------------------------------------------------------------------------------------------------------------------------------------------------------------------------------------------------------------|
|  | <pre> &lt;/xs:sequence&gt; &lt;/xs:complexType&gt; &lt;/xs:element&gt; &lt;/xs:choice&gt; &lt;/xs:sequence&gt; &lt;xs:attribute name="CreatedBy" type="xs:string" use="required"/&gt; &lt;xs:attribute name="Date" type="xs:date" use="required"/&gt; &lt;xs:attribute name="Version" type="xs:string" use="required"/&gt; &lt;/xs:complexType&gt; &lt;/xs:element&gt; </pre> |
|--|-------------------------------------------------------------------------------------------------------------------------------------------------------------------------------------------------------------------------------------------------------------------------------------------------------------------------------------------------------------------------------|

**attribute DATASET/@CreatedBy**

|            |                                                                                     |
|------------|-------------------------------------------------------------------------------------|
| type       | <b>xs:string</b>                                                                    |
| properties | use required                                                                        |
| source     | <code>&lt;xs:attribute name="CreatedBy" type="xs:string" use="required"/&gt;</code> |

**attribute DATASET/@Date**

|            |                                                                              |
|------------|------------------------------------------------------------------------------|
| type       | <b>xs:date</b>                                                               |
| properties | use required                                                                 |
| source     | <code>&lt;xs:attribute name="Date" type="xs:date" use="required"/&gt;</code> |

**attribute DATASET/@Version**

|            |                                                                                   |
|------------|-----------------------------------------------------------------------------------|
| type       | <b>xs:string</b>                                                                  |
| properties | use required                                                                      |
| source     | <code>&lt;xs:attribute name="Version" type="xs:string" use="required"/&gt;</code> |

element DATASET/Preprocessing

|            |                                                                                                                                                                                                                                                                                                                                                                                                                                                                                                                                                                                                                                                                                                                                                                                                                                                                                                                                                                                                                                                                                                                                                                                                                                                                                                                                                                                   |
|------------|-----------------------------------------------------------------------------------------------------------------------------------------------------------------------------------------------------------------------------------------------------------------------------------------------------------------------------------------------------------------------------------------------------------------------------------------------------------------------------------------------------------------------------------------------------------------------------------------------------------------------------------------------------------------------------------------------------------------------------------------------------------------------------------------------------------------------------------------------------------------------------------------------------------------------------------------------------------------------------------------------------------------------------------------------------------------------------------------------------------------------------------------------------------------------------------------------------------------------------------------------------------------------------------------------------------------------------------------------------------------------------------|
| diagram    |                                                                                                                                                                                                                                                                                                                                                                                                                                                                                                                                                                                                                                                                                                                                                                                                                                                                                                                                                                                                                                                                                                                                                                                                                                                                                                                                                                                   |
| namespace  | http://gabrmn.uab.es/jmruixml_sv                                                                                                                                                                                                                                                                                                                                                                                                                                                                                                                                                                                                                                                                                                                                                                                                                                                                                                                                                                                                                                                                                                                                                                                                                                                                                                                                                  |
| properties | content complex                                                                                                                                                                                                                                                                                                                                                                                                                                                                                                                                                                                                                                                                                                                                                                                                                                                                                                                                                                                                                                                                                                                                                                                                                                                                                                                                                                   |
| children   | <a href="#">sv:SetReference</a> <a href="#">sv:Apodization</a> <a href="#">sv:WaterFiltering</a> <a href="#">sv:BaselineCorrection</a> <a href="#">sv:NumberOfPoints</a> <a href="#">sv:SetToUnitLength</a> <a href="#">sv:AlignmentCorrection</a> <a href="#">sv:AdditionalInformation</a>                                                                                                                                                                                                                                                                                                                                                                                                                                                                                                                                                                                                                                                                                                                                                                                                                                                                                                                                                                                                                                                                                       |
| source     | <pre> &lt;xs:element name="Preprocessing"&gt;   &lt;xs:complexType&gt;     &lt;xs:sequence&gt;       &lt;xs:element name="SetReference" type="xs:double" minOccurs="0"/&gt;       &lt;xs:element name="Apodization" minOccurs="0"&gt;         &lt;xs:complexType&gt;           &lt;xs:choice&gt;             &lt;xs:element name="Lorentzian"&gt;               &lt;xs:complexType&gt;                 &lt;xs:sequence&gt;                   &lt;xs:element name="Hz" type="xs:integer"/&gt;                 &lt;/xs:sequence&gt;               &lt;/xs:complexType&gt;             &lt;/xs:element&gt;             &lt;xs:element name="Gaussian"&gt;               &lt;xs:complexType&gt;                 &lt;xs:sequence&gt;                   &lt;xs:element name="Hz" type="xs:integer"/&gt;                 &lt;/xs:sequence&gt;               &lt;/xs:complexType&gt;             &lt;/xs:element&gt;           &lt;/xs:choice&gt;         &lt;/xs:complexType&gt;       &lt;/xs:element&gt;       &lt;xs:element name="WaterFiltering" minOccurs="0"&gt;         &lt;xs:complexType&gt;           &lt;xs:sequence&gt;             &lt;xs:element name="NumberOfLorentzians" type="xs:integer"/&gt;           &lt;/xs:sequence&gt;         &lt;/xs:complexType&gt;       &lt;/xs:element&gt;     &lt;/xs:sequence&gt;   &lt;/xs:complexType&gt; &lt;/xs:element&gt; </pre> |

```

    <xs:sequence maxOccurs="3">
      <xs:element name="MinPPM" type="xs:double"/>
      <xs:element name="MaxPPM" type="xs:double"/>
    </xs:sequence>
  </xs:sequence>
</xs:complexType>
</xs:element>
<xs:element name="BaselineCorrection" minOccurs="0">
  <xs:complexType>
    <xs:sequence maxOccurs="3">
      <xs:element name="MinPPM" type="xs:double"/>
      <xs:element name="MaxPPM" type="xs:double"/>
    </xs:sequence>
  </xs:complexType>
</xs:element>
<xs:element name="NumberOfPoints" minOccurs="0">
  <xs:complexType>
    <xs:sequence>
      <xs:element name="NrPoints" type="xs:integer"/>
      <xs:element name="MinPPM" type="xs:double"/>
      <xs:element name="MaxPPM" type="xs:double"/>
    </xs:sequence>
  </xs:complexType>
</xs:element>
<xs:element name="SetToUnitLength" type="xs:boolean" minOccurs="0"/>
<xs:element name="AlignmentCorrection" minOccurs="0">
  <xs:complexType>
    <xs:sequence>
      <xs:element name="isBrainH" type="xs:boolean"/>
      <xs:element name="minSNR" type="xs:double"/>
      <xs:element name="minSTD" type="xs:double"/>
      <xs:element name="maxSTD" type="xs:double"/>
      <xs:element name="firstPeak" type="xs:double"/>
      <xs:element name="secondPeak" type="xs:double" minOccurs="0"/>
      <xs:element name="thirdPeak" type="xs:double" minOccurs="0"/>
    </xs:sequence>
  </xs:complexType>
</xs:element>
<xs:element name="AdditionalInformation">
  <xs:complexType>
    <xs:sequence>
      <xs:element name="Name" type="xs:string"/>
      <xs:element name="Place" type="xs:string"/>
      <xs:element name="Keywords" type="xs:string" minOccurs="0"/>
      <xs:element name="Observations" type="xs:string" minOccurs="0"/>
    </xs:sequence>
  </xs:complexType>
</xs:element>
</xs:sequence>
</xs:complexType>
</xs:element>

```

element DATASET/Preprocessing/SetRefernce

|            |                                                                                   |
|------------|-----------------------------------------------------------------------------------|
| diagram    | 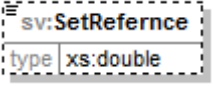 |
| namespace  | http://gabrmn.uab.es/jmrui2xml_sv                                                 |
| type       | <b>xs:double</b>                                                                  |
| properties | minOcc 0<br>maxOcc 1<br>content simple                                            |
| source     | <xs:element name="SetRefernce" type="xs:double" minOccurs="0"/>                   |

element DATASET/Preprocessing/Apodization

|            |                                                                                                                                                                                                                                                                                                                                                                                                                                                                                                                                                                                                                                                                                                              |
|------------|--------------------------------------------------------------------------------------------------------------------------------------------------------------------------------------------------------------------------------------------------------------------------------------------------------------------------------------------------------------------------------------------------------------------------------------------------------------------------------------------------------------------------------------------------------------------------------------------------------------------------------------------------------------------------------------------------------------|
| diagram    | 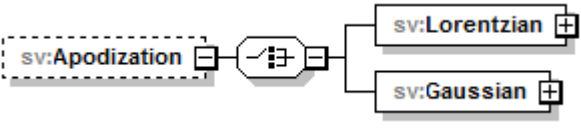                                                                                                                                                                                                                                                                                                                                                                                                                                                                                                                                                                                                                            |
| namespace  | http://gabrmn.uab.es/jmrui2xml_sv                                                                                                                                                                                                                                                                                                                                                                                                                                                                                                                                                                                                                                                                            |
| properties | minOcc 0<br>maxOcc 1<br>content complex                                                                                                                                                                                                                                                                                                                                                                                                                                                                                                                                                                                                                                                                      |
| children   | <a href="#">sv:Lorentzian</a> <a href="#">sv:Gaussian</a>                                                                                                                                                                                                                                                                                                                                                                                                                                                                                                                                                                                                                                                    |
| source     | <pre> &lt;xs:element name="Apodization" minOccurs="0"&gt;   &lt;xs:complexType&gt;     &lt;xs:choice&gt;       &lt;xs:element name="Lorentzian"&gt;         &lt;xs:complexType&gt;           &lt;xs:sequence&gt;             &lt;xs:element name="Hz" type="xs:integer"/&gt;           &lt;/xs:sequence&gt;         &lt;/xs:complexType&gt;       &lt;/xs:element&gt;       &lt;xs:element name="Gaussian"&gt;         &lt;xs:complexType&gt;           &lt;xs:sequence&gt;             &lt;xs:element name="Hz" type="xs:integer"/&gt;           &lt;/xs:sequence&gt;         &lt;/xs:complexType&gt;       &lt;/xs:element&gt;     &lt;/xs:choice&gt;   &lt;/xs:complexType&gt; &lt;/xs:element&gt; </pre> |

element DATASET/Preprocessing/Apodization/Lorentzian

|         |                                                                                     |
|---------|-------------------------------------------------------------------------------------|
| diagram | 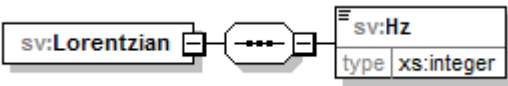 |
|---------|-------------------------------------------------------------------------------------|

|            |                                                                                                                                                                                                                               |
|------------|-------------------------------------------------------------------------------------------------------------------------------------------------------------------------------------------------------------------------------|
| namespace  | http://gabrmn.uab.es/jmrui2xml_sv                                                                                                                                                                                             |
| properties | content complex                                                                                                                                                                                                               |
| children   | <a href="#">sv:Hz</a>                                                                                                                                                                                                         |
| source     | <pre>&lt;xs:element name="Lorentzian"&gt;   &lt;xs:complexType&gt;     &lt;xs:sequence&gt;       &lt;xs:element name="Hz" type="xs:integer"/&gt;     &lt;/xs:sequence&gt;   &lt;/xs:complexType&gt; &lt;/xs:element&gt;</pre> |

**element DATASET/Preprocessing/Apodization/Lorentzian/Hz**

|            |                                                                                   |
|------------|-----------------------------------------------------------------------------------|
| diagram    | 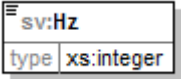 |
| namespace  | http://gabrmn.uab.es/jmrui2xml_sv                                                 |
| type       | <b>xs:integer</b>                                                                 |
| properties | content simple                                                                    |
| source     | <pre>&lt;xs:element name="Hz" type="xs:integer"/&gt;</pre>                        |

**element DATASET/Preprocessing/Apodization/Gaussian**

|            |                                                                                                                                                                                                                             |
|------------|-----------------------------------------------------------------------------------------------------------------------------------------------------------------------------------------------------------------------------|
| diagram    | 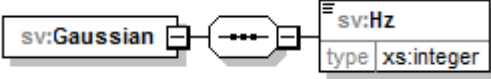                                                                                                                                         |
| namespace  | http://gabrmn.uab.es/jmrui2xml_sv                                                                                                                                                                                           |
| properties | content complex                                                                                                                                                                                                             |
| children   | <a href="#">sv:Hz</a>                                                                                                                                                                                                       |
| source     | <pre>&lt;xs:element name="Gaussian"&gt;   &lt;xs:complexType&gt;     &lt;xs:sequence&gt;       &lt;xs:element name="Hz" type="xs:integer"/&gt;     &lt;/xs:sequence&gt;   &lt;/xs:complexType&gt; &lt;/xs:element&gt;</pre> |

**element DATASET/Preprocessing/Apodization/Gaussian/Hz**

|           |                                                                                     |
|-----------|-------------------------------------------------------------------------------------|
| diagram   | 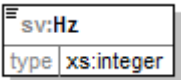 |
| namespace | http://gabrmn.uab.es/jmrui2xml_sv                                                   |



|            |                                                              |
|------------|--------------------------------------------------------------|
| type       | <b>xs:integer</b>                                            |
| properties | content simple                                               |
| source     | <code>&lt;xs:element name="Hz" type="xs:integer"/&gt;</code> |

**element DATASET/Preprocessing/WaterFiltering**

|            |                                                                                                                                                                                                                                                                                                                                                                                                                                                             |
|------------|-------------------------------------------------------------------------------------------------------------------------------------------------------------------------------------------------------------------------------------------------------------------------------------------------------------------------------------------------------------------------------------------------------------------------------------------------------------|
| diagram    |                                                                                                                                                                                                                                                                                                                                                                                                                                                             |
| namespace  | http://gabrmn.uab.es/jmruixml_sv                                                                                                                                                                                                                                                                                                                                                                                                                            |
| properties | minOcc 0<br>maxOcc 1<br>content complex                                                                                                                                                                                                                                                                                                                                                                                                                     |
| children   | <a href="#">sv:NumberOfLorentzians</a> <a href="#">sv:MinPPM</a> <a href="#">sv:MaxPPM</a>                                                                                                                                                                                                                                                                                                                                                                  |
| source     | <pre> &lt;xs:element name="WaterFiltering" minOccurs="0"&gt;   &lt;xs:complexType&gt;     &lt;xs:sequence&gt;       &lt;xs:element name="NumberOfLorentzians" type="xs:integer"/&gt;       &lt;xs:sequence maxOccurs="3"&gt;         &lt;xs:element name="MinPPM" type="xs:double"/&gt;         &lt;xs:element name="MaxPPM" type="xs:double"/&gt;       &lt;/xs:sequence&gt;     &lt;/xs:sequence&gt;   &lt;/xs:complexType&gt; &lt;/xs:element&gt; </pre> |

**element DATASET/Preprocessing/WaterFiltering/NumberOfLorentzians**

|            |                                                                               |
|------------|-------------------------------------------------------------------------------|
| diagram    |                                                                               |
| namespace  | http://gabrmn.uab.es/jmruixml_sv                                              |
| type       | <b>xs:integer</b>                                                             |
| properties | content simple                                                                |
| source     | <code>&lt;xs:element name="NumberOfLorentzians" type="xs:integer"/&gt;</code> |

element DATASET/Preprocessing/WaterFiltering/MinPPM

|            |                                                                                   |
|------------|-----------------------------------------------------------------------------------|
| diagram    |  |
| namespace  | http://gabrmn.uab.es/jmru2xml_sv                                                  |
| type       | <b>xs:double</b>                                                                  |
| properties | content simple                                                                    |
| source     | <code>&lt;xs:element name="MinPPM" type="xs:double"/&gt;</code>                   |

element DATASET/Preprocessing/WaterFiltering/MaxPPM

|            |                                                                                   |
|------------|-----------------------------------------------------------------------------------|
| diagram    | 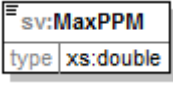 |
| namespace  | http://gabrmn.uab.es/jmru2xml_sv                                                  |
| type       | <b>xs:double</b>                                                                  |
| properties | content simple                                                                    |
| source     | <code>&lt;xs:element name="MaxPPM" type="xs:double"/&gt;</code>                   |

element DATASET/Preprocessing/BaselineCorrection

|            |                                                                                                                                                                                                                                                                                                                                                 |
|------------|-------------------------------------------------------------------------------------------------------------------------------------------------------------------------------------------------------------------------------------------------------------------------------------------------------------------------------------------------|
| diagram    | 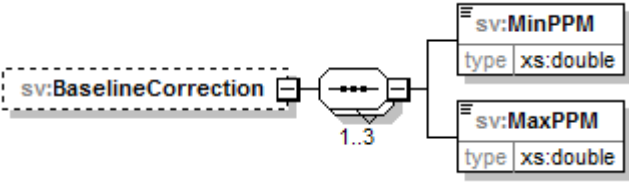                                                                                                                                                                                                                                                             |
| namespace  | http://gabrmn.uab.es/jmru2xml_sv                                                                                                                                                                                                                                                                                                                |
| properties | minOcc 0<br>maxOcc 1<br>content complex                                                                                                                                                                                                                                                                                                         |
| children   | <a href="#">sv:MinPPM</a> <a href="#">sv:MaxPPM</a>                                                                                                                                                                                                                                                                                             |
| source     | <code>&lt;xs:element name="BaselineCorrection" minOccurs="0"&gt;<br/>&lt;xs:complexType&gt;<br/>  &lt;xs:sequence maxOccurs="3"&gt;<br/>    &lt;xs:element name="MinPPM" type="xs:double"/&gt;<br/>    &lt;xs:element name="MaxPPM" type="xs:double"/&gt;<br/>  &lt;/xs:sequence&gt;<br/>&lt;/xs:complexType&gt;<br/>&lt;/xs:element&gt;</code> |

element DATASET/Preprocessing/BaselineCorrection/MinPPM

|            |                                                                                   |
|------------|-----------------------------------------------------------------------------------|
| diagram    |  |
| namespace  | http://gabrmn.uab.es/jmruui2xml_sv                                                |
| type       | <b>xs:double</b>                                                                  |
| properties | content simple                                                                    |
| source     | <code>&lt;xs:element name="MinPPM" type="xs:double"/&gt;</code>                   |

element DATASET/Preprocessing/BaselineCorrection/MaxPPM

|            |                                                                                   |
|------------|-----------------------------------------------------------------------------------|
| diagram    |  |
| namespace  | http://gabrmn.uab.es/jmruui2xml_sv                                                |
| type       | <b>xs:double</b>                                                                  |
| properties | content simple                                                                    |
| source     | <code>&lt;xs:element name="MaxPPM" type="xs:double"/&gt;</code>                   |

element DATASET/Preprocessing/NumberOfPoints

|            |                                                                                                                                                                                                                                                                                                                                                                         |
|------------|-------------------------------------------------------------------------------------------------------------------------------------------------------------------------------------------------------------------------------------------------------------------------------------------------------------------------------------------------------------------------|
| diagram    | 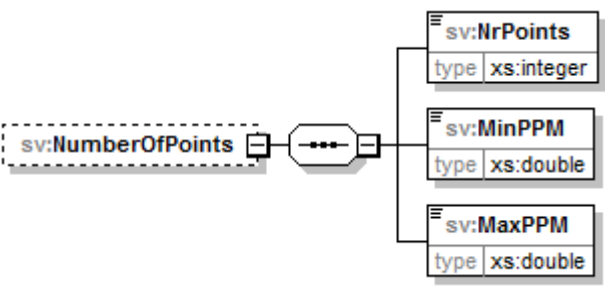                                                                                                                                                                                                                                                                                     |
| namespace  | http://gabrmn.uab.es/jmruui2xml_sv                                                                                                                                                                                                                                                                                                                                      |
| properties | minOcc 0<br>maxOcc 1<br>content complex                                                                                                                                                                                                                                                                                                                                 |
| children   | <a href="#">sv:NrPoints</a> <a href="#">sv:MinPPM</a> <a href="#">sv:MaxPPM</a>                                                                                                                                                                                                                                                                                         |
| source     | <pre>&lt;xs:element name="NumberOfPoints" minOccurs="0"&gt;   &lt;xs:complexType&gt;     &lt;xs:sequence&gt;       &lt;xs:element name="NrPoints" type="xs:integer"/&gt;       &lt;xs:element name="MinPPM" type="xs:double"/&gt;       &lt;xs:element name="MaxPPM" type="xs:double"/&gt;     &lt;/xs:sequence&gt;   &lt;/xs:complexType&gt; &lt;/xs:element&gt;</pre> |

element DATASET/Preprocessing/NumberOfPoints/NrPoints

|            |                                                                                   |
|------------|-----------------------------------------------------------------------------------|
| diagram    |  |
| namespace  | http://gabrmn.uab.es/jmrui2xml_sv                                                 |
| type       | <b>xs:integer</b>                                                                 |
| properties | content simple                                                                    |
| source     | <code>&lt;xs:element name="NrPoints" type="xs:integer"/&gt;</code>                |

element DATASET/Preprocessing/NumberOfPoints/MinPPM

|            |                                                                                   |
|------------|-----------------------------------------------------------------------------------|
| diagram    | 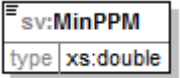 |
| namespace  | http://gabrmn.uab.es/jmrui2xml_sv                                                 |
| type       | <b>xs:double</b>                                                                  |
| properties | content simple                                                                    |
| source     | <code>&lt;xs:element name="MinPPM" type="xs:double"/&gt;</code>                   |

element DATASET/Preprocessing/NumberOfPoints/MaxPPM

|            |                                                                                     |
|------------|-------------------------------------------------------------------------------------|
| diagram    | 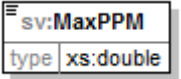 |
| namespace  | http://gabrmn.uab.es/jmrui2xml_sv                                                   |
| type       | <b>xs:double</b>                                                                    |
| properties | content simple                                                                      |
| source     | <code>&lt;xs:element name="MaxPPM" type="xs:double"/&gt;</code>                     |

element DATASET/Preprocessing/SetToUnitLength

|            |                                                                                         |
|------------|-----------------------------------------------------------------------------------------|
| diagram    | 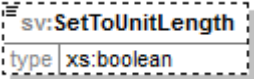     |
| namespace  | http://gabrmn.uab.es/jmrui2xml_sv                                                       |
| type       | <b>xs:boolean</b>                                                                       |
| properties | minOcc 0<br>maxOcc 1<br>content simple                                                  |
| source     | <code>&lt;xs:element name="SetToUnitLength" type="xs:boolean" minOccurs="0"/&gt;</code> |

element DATASET/Preprocessing/AlignmentCorrection

|            |                                                                                                                                                                                                                                                                                                                                                                                                                                                                                                                                                                                                                                                          |
|------------|----------------------------------------------------------------------------------------------------------------------------------------------------------------------------------------------------------------------------------------------------------------------------------------------------------------------------------------------------------------------------------------------------------------------------------------------------------------------------------------------------------------------------------------------------------------------------------------------------------------------------------------------------------|
| diagram    |                                                                                                                                                                                                                                                                                                                                                                                                                                                                                                                                                                                                                                                          |
| namespace  | http://gabrmn.uab.es/jmrui2xml_sv                                                                                                                                                                                                                                                                                                                                                                                                                                                                                                                                                                                                                        |
| properties | minOcc 0<br>maxOcc 1<br>content complex                                                                                                                                                                                                                                                                                                                                                                                                                                                                                                                                                                                                                  |
| children   | <a href="#">sv:isBrainH</a> <a href="#">sv:minSNR</a> <a href="#">sv:minSTD</a> <a href="#">sv:maxSTD</a> <a href="#">sv:firstPeak</a> <a href="#">sv:secondPeak</a> <a href="#">sv:thirdPeak</a>                                                                                                                                                                                                                                                                                                                                                                                                                                                        |
| source     | <pre> &lt;xs:element name="AlignmentCorrection" minOccurs="0"&gt;   &lt;xs:complexType&gt;     &lt;xs:sequence&gt;       &lt;xs:element name="isBrainH" type="xs:boolean"/&gt;       &lt;xs:element name="minSNR" type="xs:double"/&gt;       &lt;xs:element name="minSTD" type="xs:double"/&gt;       &lt;xs:element name="maxSTD" type="xs:double"/&gt;       &lt;xs:element name="firstPeak" type="xs:double"/&gt;       &lt;xs:element name="secondPeak" type="xs:double" minOccurs="0"/&gt;       &lt;xs:element name="thirdPeak" type="xs:double" minOccurs="0"/&gt;     &lt;/xs:sequence&gt;   &lt;/xs:complexType&gt; &lt;/xs:element&gt; </pre> |

element DATASET/Preprocessing/AlignmentCorrection/isBrainH

|           |                                   |
|-----------|-----------------------------------|
| diagram   |                                   |
| namespace | http://gabrmn.uab.es/jmrui2xml_sv |

|            |                                                                    |
|------------|--------------------------------------------------------------------|
| type       | <b>xs:boolean</b>                                                  |
| properties | content simple                                                     |
| source     | <code>&lt;xs:element name="isBrainH" type="xs:boolean"/&gt;</code> |

#### element DATASET/Preprocessing/AlignmentCorrection/minSNR

|            |                                                                                   |
|------------|-----------------------------------------------------------------------------------|
| diagram    | 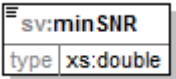 |
| namespace  | http://gabrmn.uab.es/jmruui2xml_sv                                                |
| type       | <b>xs:double</b>                                                                  |
| properties | content simple                                                                    |
| source     | <code>&lt;xs:element name="minSNR" type="xs:double"/&gt;</code>                   |

#### element DATASET/Preprocessing/AlignmentCorrection/minSTD

|            |                                                                                   |
|------------|-----------------------------------------------------------------------------------|
| diagram    | 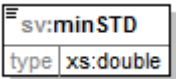 |
| namespace  | http://gabrmn.uab.es/jmruui2xml_sv                                                |
| type       | <b>xs:double</b>                                                                  |
| properties | content simple                                                                    |
| source     | <code>&lt;xs:element name="minSTD" type="xs:double"/&gt;</code>                   |

#### element DATASET/Preprocessing/AlignmentCorrection/maxSTD

|            |                                                                                     |
|------------|-------------------------------------------------------------------------------------|
| diagram    | 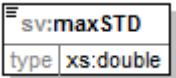 |
| namespace  | http://gabrmn.uab.es/jmruui2xml_sv                                                  |
| type       | <b>xs:double</b>                                                                    |
| properties | content simple                                                                      |
| source     | <code>&lt;xs:element name="maxSTD" type="xs:double"/&gt;</code>                     |

#### element DATASET/Preprocessing/AlignmentCorrection/firstPeak

|           |                                                                                     |
|-----------|-------------------------------------------------------------------------------------|
| diagram   | 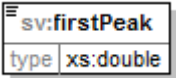 |
| namespace | http://gabrmn.uab.es/jmruui2xml_sv                                                  |

|            |                                                                    |
|------------|--------------------------------------------------------------------|
| type       | <b>xs:double</b>                                                   |
| properties | content simple                                                     |
| source     | <code>&lt;xs:element name="firstPeak" type="xs:double"/&gt;</code> |

**element DATASET/Preprocessing/AlignmentCorrection/secondPeak**

|            |                                                                                   |
|------------|-----------------------------------------------------------------------------------|
| diagram    |                                                                                   |
| namespace  | http://gabrmn.uab.es/jmrui2xml_sv                                                 |
| type       | <b>xs:double</b>                                                                  |
| properties | minOcc 0<br>maxOcc 1<br>content simple                                            |
| source     | <code>&lt;xs:element name="secondPeak" type="xs:double" minOccurs="0"/&gt;</code> |

**element DATASET/Preprocessing/AlignmentCorrection/thirdPeak**

|            |                                                                                  |
|------------|----------------------------------------------------------------------------------|
| diagram    |                                                                                  |
| namespace  | http://gabrmn.uab.es/jmrui2xml_sv                                                |
| type       | <b>xs:double</b>                                                                 |
| properties | minOcc 0<br>maxOcc 1<br>content simple                                           |
| source     | <code>&lt;xs:element name="thirdPeak" type="xs:double" minOccurs="0"/&gt;</code> |

**element DATASET/Preprocessing/AdditionalInformation**

|            |                                   |
|------------|-----------------------------------|
| diagram    |                                   |
| namespace  | http://gabrmn.uab.es/jmrui2xml_sv |
| properties | content complex                   |

|          |                                                                                                                                                                                                                                                                                                                                                                                                                                                         |
|----------|---------------------------------------------------------------------------------------------------------------------------------------------------------------------------------------------------------------------------------------------------------------------------------------------------------------------------------------------------------------------------------------------------------------------------------------------------------|
| children | <a href="#">sv:Name</a> <a href="#">sv:Place</a> <a href="#">sv:Keywords</a> <a href="#">sv:Observations</a>                                                                                                                                                                                                                                                                                                                                            |
| source   | <pre>&lt;xs:element name="AdditionalInformation"&gt;   &lt;xs:complexType&gt;     &lt;xs:sequence&gt;       &lt;xs:element name="Name" type="xs:string"/&gt;       &lt;xs:element name="Place" type="xs:string"/&gt;       &lt;xs:element name="Keywords" type="xs:string" minOccurs="0"/&gt;       &lt;xs:element name="Observations" type="xs:string" minOccurs="0"/&gt;     &lt;/xs:sequence&gt;   &lt;/xs:complexType&gt; &lt;/xs:element&gt;</pre> |

#### element DATASET/Preprocessing/AdditionalInformation/Name

|            |                                                                                   |
|------------|-----------------------------------------------------------------------------------|
| diagram    | 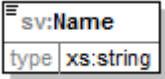 |
| namespace  | http://gabrmn.uab.es/jmrui2xml_sv                                                 |
| type       | <b>xs:string</b>                                                                  |
| properties | content simple                                                                    |
| source     | <pre>&lt;xs:element name="Name" type="xs:string"/&gt;</pre>                       |

#### element DATASET/Preprocessing/AdditionalInformation/Place

|            |                                                                                     |
|------------|-------------------------------------------------------------------------------------|
| diagram    |  |
| namespace  | http://gabrmn.uab.es/jmrui2xml_sv                                                   |
| type       | <b>xs:string</b>                                                                    |
| properties | content simple                                                                      |
| source     | <pre>&lt;xs:element name="Place" type="xs:string"/&gt;</pre>                        |

#### element DATASET/Preprocessing/AdditionalInformation/Keywords

|            |                                                                                     |
|------------|-------------------------------------------------------------------------------------|
| diagram    | 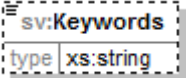 |
| namespace  | http://gabrmn.uab.es/jmrui2xml_sv                                                   |
| type       | <b>xs:string</b>                                                                    |
| properties | minOcc 0<br>maxOcc 1<br>content simple                                              |
| source     | <pre>&lt;xs:element name="Keywords" type="xs:string" minOccurs="0"/&gt;</pre>       |



element DATASET/Preprocessing/AdditionalInformation/Observations

|            |                                                                                     |
|------------|-------------------------------------------------------------------------------------|
| diagram    |                                                                                     |
| namespace  | http://gabrmn.uab.es/jmrui2xml_sv                                                   |
| type       | <b>xs:string</b>                                                                    |
| properties | minOcc 0<br>maxOcc 1<br>content simple                                              |
| source     | <code>&lt;xs:element name="Observations" type="xs:string" minOccurs="0"/&gt;</code> |

element DATASET/Voxel

|            |                                                                                                                                      |                   |          |         |       |            |
|------------|--------------------------------------------------------------------------------------------------------------------------------------|-------------------|----------|---------|-------|------------|
| diagram    |                                                                                                                                      |                   |          |         |       |            |
| namespace  | http://gabrmn.uab.es/jmrui2xml_sv                                                                                                    |                   |          |         |       |            |
| properties | content complex                                                                                                                      |                   |          |         |       |            |
| children   | <a href="#">sv:Tissue</a> <a href="#">sv:Spectrum</a>                                                                                |                   |          |         |       |            |
| attributes | Name                                                                                                                                 | Type              | Use      | Default | Fixed | Annotation |
|            | <a href="#">FirstPPM</a>                                                                                                             | <b>xs:double</b>  | required |         |       |            |
|            | <a href="#">LastPPM</a>                                                                                                              | <b>xs:double</b>  | required |         |       |            |
|            | <a href="#">NumberOfPoints</a>                                                                                                       | <b>xs:integer</b> | required |         |       |            |
|            | <a href="#">SNR</a>                                                                                                                  | <b>xs:double</b>  |          |         |       |            |
| source     | <pre> &lt;xs:element name="Voxel"&gt;   &lt;xs:complexType&gt;     &lt;xs:sequence&gt;       &lt;xs:element name="Tissue"&gt; </pre> |                   |          |         |       |            |

|  |                                                                                                                                                                                                                                                                                                                                                                                                                                                                                                                     |
|--|---------------------------------------------------------------------------------------------------------------------------------------------------------------------------------------------------------------------------------------------------------------------------------------------------------------------------------------------------------------------------------------------------------------------------------------------------------------------------------------------------------------------|
|  | <pre> &lt;xs:complexType&gt;   &lt;xs:attribute name="Type" type="xs:string"/&gt; &lt;/xs:complexType&gt; &lt;/xs:element&gt; &lt;xs:element name="Spectrum"/&gt; &lt;/xs:sequence&gt; &lt;xs:attribute name="FirstPPM" type="xs:double" use="required"/&gt; &lt;xs:attribute name="LastPPM" type="xs:double" use="required"/&gt; &lt;xs:attribute name="NumberOfPoints" type="xs:integer" use="required"/&gt; &lt;xs:attribute name="SNR" type="xs:double"/&gt; &lt;/xs:complexType&gt; &lt;/xs:element&gt; </pre> |
|--|---------------------------------------------------------------------------------------------------------------------------------------------------------------------------------------------------------------------------------------------------------------------------------------------------------------------------------------------------------------------------------------------------------------------------------------------------------------------------------------------------------------------|

attribute DATASET/Voxel/@FirstPPM

|            |                                                                 |
|------------|-----------------------------------------------------------------|
| type       | xs:double                                                       |
| properties | use required                                                    |
| source     | <xs:attribute name="FirstPPM" type="xs:double" use="required"/> |

attribute DATASET/Voxel/@LastPPM

|            |                                                                |
|------------|----------------------------------------------------------------|
| type       | xs:double                                                      |
| properties | use required                                                   |
| source     | <xs:attribute name="LastPPM" type="xs:double" use="required"/> |

attribute DATASET/Voxel/@NumberOfPoints

|            |                                                                        |
|------------|------------------------------------------------------------------------|
| type       | xs:integer                                                             |
| properties | use required                                                           |
| source     | <xs:attribute name="NumberOfPoints" type="xs:integer" use="required"/> |

attribute DATASET/Voxel/@SNR

|        |                                             |
|--------|---------------------------------------------|
| type   | xs:double                                   |
| source | <xs:attribute name="SNR" type="xs:double"/> |

element DATASET/Voxel/Tissue

|           |                                                                                                                            |
|-----------|----------------------------------------------------------------------------------------------------------------------------|
| diagram   | <pre> classDiagram     class svTissue["sv:Tissue"]     class Type["Type"]     svTissue --&gt; Type : type xs:string </pre> |
| namespace | http://gabrmn.uab.es/jmrui2xml_sv                                                                                          |

| properties           | content complex                                                                                                                                                                                                                                                           |      |         |       |            |       |            |                      |           |  |  |  |  |
|----------------------|---------------------------------------------------------------------------------------------------------------------------------------------------------------------------------------------------------------------------------------------------------------------------|------|---------|-------|------------|-------|------------|----------------------|-----------|--|--|--|--|
| attributes           | <table border="1"> <thead> <tr> <th>Name</th> <th>Type</th> <th>Use</th> <th>Default</th> <th>Fixed</th> <th>Annotation</th> </tr> </thead> <tbody> <tr> <td><a href="#">Type</a></td> <td>xs:string</td> <td></td> <td></td> <td></td> <td></td> </tr> </tbody> </table> | Name | Type    | Use   | Default    | Fixed | Annotation | <a href="#">Type</a> | xs:string |  |  |  |  |
| Name                 | Type                                                                                                                                                                                                                                                                      | Use  | Default | Fixed | Annotation |       |            |                      |           |  |  |  |  |
| <a href="#">Type</a> | xs:string                                                                                                                                                                                                                                                                 |      |         |       |            |       |            |                      |           |  |  |  |  |
| source               | <pre>&lt;xs:element name="Tissue"&gt;   &lt;xs:complexType&gt;     &lt;xs:attribute name="Type" type="xs:string"/&gt;   &lt;/xs:complexType&gt; &lt;/xs:element&gt;</pre>                                                                                                 |      |         |       |            |       |            |                      |           |  |  |  |  |

#### attribute DATASET/Voxel/Tissue/@Type

|        |                                                               |
|--------|---------------------------------------------------------------|
| type   | xs:string                                                     |
| source | <pre>&lt;xs:attribute name="Type" type="xs:string"/&gt;</pre> |

#### element DATASET/Voxel/Spectrum

|           |                                                |
|-----------|------------------------------------------------|
| diagram   |                                                |
| namespace | http://gabrmn.uab.es/jmruixml_sv               |
| source    | <pre>&lt;xs:element name="Spectrum"/&gt;</pre> |

#### element DATASET/Grid

|            |                                                                                                                                                                                                                                                                                                                                                                                                                                                                                                                                                                                                                                                                                                                                                                                                                                                                                                                                                                                                    |
|------------|----------------------------------------------------------------------------------------------------------------------------------------------------------------------------------------------------------------------------------------------------------------------------------------------------------------------------------------------------------------------------------------------------------------------------------------------------------------------------------------------------------------------------------------------------------------------------------------------------------------------------------------------------------------------------------------------------------------------------------------------------------------------------------------------------------------------------------------------------------------------------------------------------------------------------------------------------------------------------------------------------|
| diagram    |                                                                                                                                                                                                                                                                                                                                                                                                                                                                                                                                                                                                                                                                                                                                                                                                                                                                                                                                                                                                    |
| namespace  | http://gabrmn.uab.es/jmruixml_sv                                                                                                                                                                                                                                                                                                                                                                                                                                                                                                                                                                                                                                                                                                                                                                                                                                                                                                                                                                   |
| properties | content complex                                                                                                                                                                                                                                                                                                                                                                                                                                                                                                                                                                                                                                                                                                                                                                                                                                                                                                                                                                                    |
| children   | <a href="#">sv:Voxel</a>                                                                                                                                                                                                                                                                                                                                                                                                                                                                                                                                                                                                                                                                                                                                                                                                                                                                                                                                                                           |
| source     | <pre>&lt;xs:element name="Grid"&gt;   &lt;xs:complexType&gt;     &lt;xs:sequence&gt;       &lt;xs:element name="Voxel" maxOccurs="unbounded"&gt;         &lt;xs:complexType&gt;           &lt;xs:sequence&gt;             &lt;xs:element name="Tissue"&gt;               &lt;xs:complexType&gt;                 &lt;xs:attribute name="Type" type="xs:string"/&gt;               &lt;/xs:complexType&gt;             &lt;/xs:element&gt;             &lt;xs:element name="Spectrum"/&gt;           &lt;/xs:sequence&gt;           &lt;xs:attribute name="FirstPPM" type="xs:double" use="required"/&gt;           &lt;xs:attribute name="LastPPM" type="xs:double" use="required"/&gt;           &lt;xs:attribute name="NumberOfPoints" type="xs:integer" use="required"/&gt;           &lt;xs:attribute name="Xaxis" type="xs:integer" use="required"/&gt;         &lt;/xs:complexType&gt;       &lt;/xs:element&gt;     &lt;/xs:sequence&gt;   &lt;/xs:complexType&gt; &lt;/xs:element&gt;</pre> |

```

<xs:attribute name="Yaxis" type="xs:integer" use="required"/>
<xs:attribute name="Zaxis" type="xs:integer" use="required"/>
<xs:attribute name="SNR" type="xs:double"/>
</xs:complexType>
</xs:element>
</xs:sequence>
</xs:complexType>
</xs:element>

```

element DATASET/Grid/Voxel

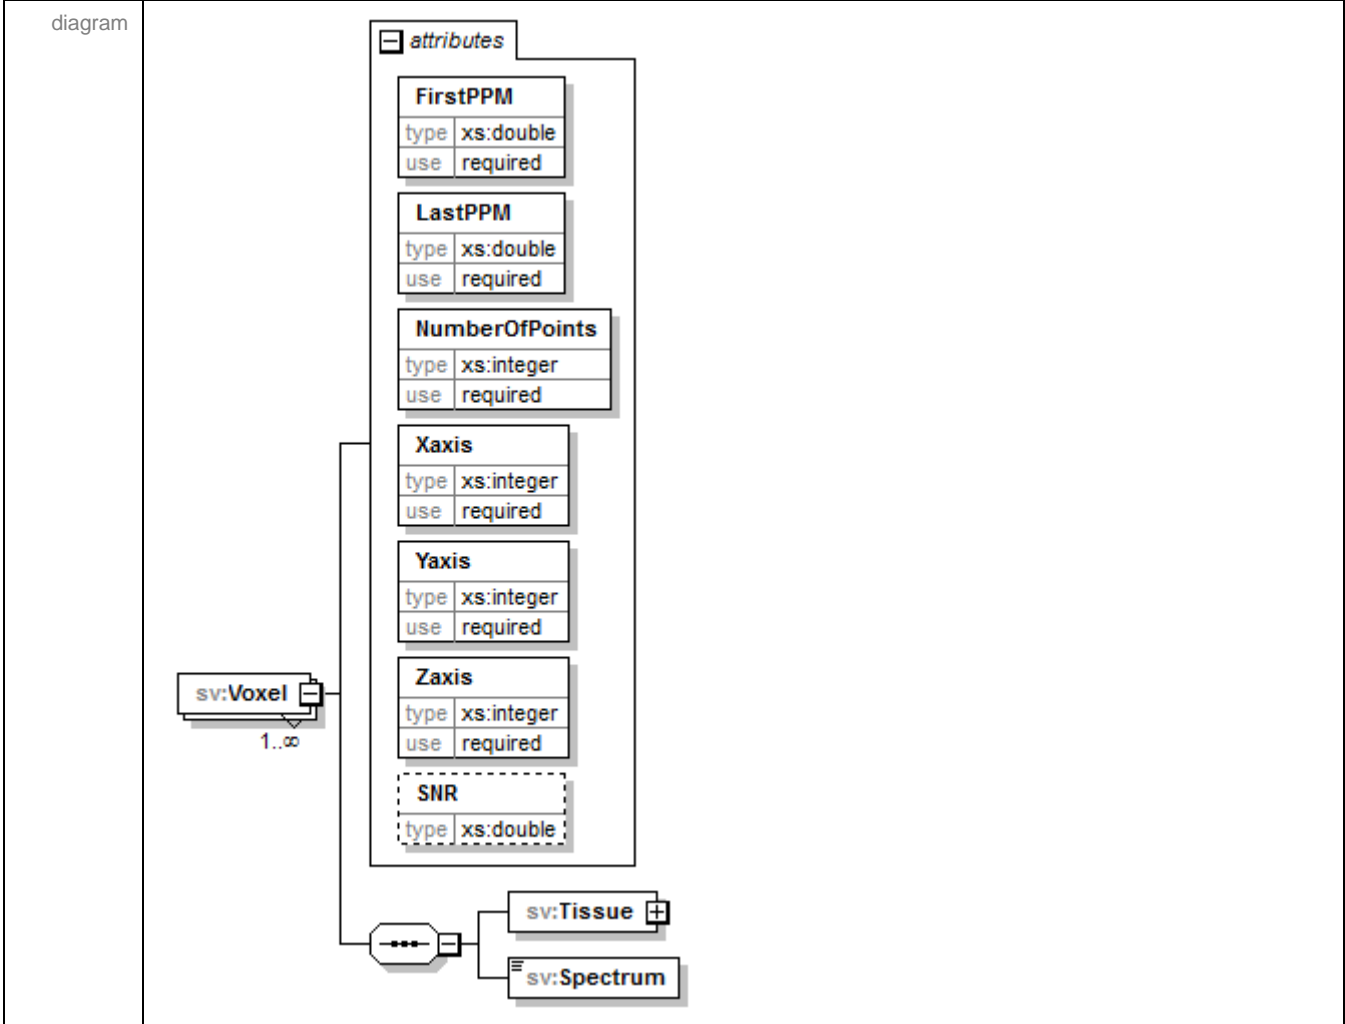

|            |                                                       |           |          |           |         |            |
|------------|-------------------------------------------------------|-----------|----------|-----------|---------|------------|
| namespace  | http://gabrmn.uab.es/jmru2xml_sv                      |           |          |           |         |            |
| properties | minOcc                                                | 1         | maxOcc   | unbounded | content | complex    |
| children   | <a href="#">sv:Tissue</a> <a href="#">sv:Spectrum</a> |           |          |           |         |            |
| attributes | Name                                                  | Type      | Use      | Default   | Fixed   | Annotation |
|            | <a href="#">FirstPPM</a>                              | xs:double | required |           |         |            |
|            | <a href="#">LastPPM</a>                               | xs:double | required |           |         |            |

|        |                                                                                                                                                                                                                                                                                                                                                                                                                                                                                                                                                                                                                                                                                                                                                                                                                                                                                                                                                     |
|--------|-----------------------------------------------------------------------------------------------------------------------------------------------------------------------------------------------------------------------------------------------------------------------------------------------------------------------------------------------------------------------------------------------------------------------------------------------------------------------------------------------------------------------------------------------------------------------------------------------------------------------------------------------------------------------------------------------------------------------------------------------------------------------------------------------------------------------------------------------------------------------------------------------------------------------------------------------------|
|        | <a href="#">NumberOfPoints</a> <b>xs:integer</b> required<br><a href="#">Xaxis</a> <b>xs:integer</b> required<br><a href="#">Yaxis</a> <b>xs:integer</b> required<br><a href="#">Zaxis</a> <b>xs:integer</b> required<br><a href="#">SNR</a> <b>xs:double</b>                                                                                                                                                                                                                                                                                                                                                                                                                                                                                                                                                                                                                                                                                       |
| source | <pre> &lt;xs:element name="Voxel" maxOccurs="unbounded"&gt;   &lt;xs:complexType&gt;     &lt;xs:sequence&gt;       &lt;xs:element name="Tissue"&gt;         &lt;xs:complexType&gt;           &lt;xs:attribute name="Type" type="xs:string"/&gt;         &lt;/xs:complexType&gt;       &lt;/xs:element&gt;       &lt;xs:element name="Spectrum"/&gt;     &lt;/xs:sequence&gt;     &lt;xs:attribute name="FirstPPM" type="xs:double" use="required"/&gt;     &lt;xs:attribute name="LastPPM" type="xs:double" use="required"/&gt;     &lt;xs:attribute name="NumberOfPoints" type="xs:integer" use="required"/&gt;     &lt;xs:attribute name="Xaxis" type="xs:integer" use="required"/&gt;     &lt;xs:attribute name="Yaxis" type="xs:integer" use="required"/&gt;     &lt;xs:attribute name="Zaxis" type="xs:integer" use="required"/&gt;     &lt;xs:attribute name="SNR" type="xs:double"/&gt;   &lt;/xs:complexType&gt; &lt;/xs:element&gt; </pre> |

attribute **DATASET/Grid/Voxel/@FirstPPM**

|            |                                                                                  |
|------------|----------------------------------------------------------------------------------|
| type       | <b>xs:double</b>                                                                 |
| properties | use required                                                                     |
| source     | <pre>&lt;xs:attribute name="FirstPPM" type="xs:double" use="required"/&gt;</pre> |

attribute **DATASET/Grid/Voxel/@LastPPM**

|            |                                                                                 |
|------------|---------------------------------------------------------------------------------|
| type       | <b>xs:double</b>                                                                |
| properties | use required                                                                    |
| source     | <pre>&lt;xs:attribute name="LastPPM" type="xs:double" use="required"/&gt;</pre> |

attribute **DATASET/Grid/Voxel/@NumberOfPoints**

|            |                                                                                         |
|------------|-----------------------------------------------------------------------------------------|
| type       | <b>xs:integer</b>                                                                       |
| properties | use required                                                                            |
| source     | <pre>&lt;xs:attribute name="NumberOfPoints" type="xs:integer" use="required"/&gt;</pre> |

attribute DATASET/Grid/Voxel/@Xaxis

|            |                                                                                  |
|------------|----------------------------------------------------------------------------------|
| type       | <b>xs:integer</b>                                                                |
| properties | use required                                                                     |
| source     | <code>&lt;xs:attribute name="Xaxis" type="xs:integer" use="required"/&gt;</code> |

attribute DATASET/Grid/Voxel/@Yaxis

|            |                                                                                  |
|------------|----------------------------------------------------------------------------------|
| type       | <b>xs:integer</b>                                                                |
| properties | use required                                                                     |
| source     | <code>&lt;xs:attribute name="Yaxis" type="xs:integer" use="required"/&gt;</code> |

attribute DATASET/Grid/Voxel/@Zaxis

|            |                                                                                  |
|------------|----------------------------------------------------------------------------------|
| type       | <b>xs:integer</b>                                                                |
| properties | use required                                                                     |
| source     | <code>&lt;xs:attribute name="Zaxis" type="xs:integer" use="required"/&gt;</code> |

attribute DATASET/Grid/Voxel/@SNR

|        |                                                                |
|--------|----------------------------------------------------------------|
| type   | <b>xs:double</b>                                               |
| source | <code>&lt;xs:attribute name="SNR" type="xs:double"/&gt;</code> |

element DATASET/Grid/Voxel/Tissue

| diagram              |                                                                                                                                                                                                                                                                                  |      |         |       |            |       |            |                      |                  |  |  |  |  |
|----------------------|----------------------------------------------------------------------------------------------------------------------------------------------------------------------------------------------------------------------------------------------------------------------------------|------|---------|-------|------------|-------|------------|----------------------|------------------|--|--|--|--|
| namespace            | http://gabrmn.uab.es/jmru2xml_sv                                                                                                                                                                                                                                                 |      |         |       |            |       |            |                      |                  |  |  |  |  |
| properties           | content complex                                                                                                                                                                                                                                                                  |      |         |       |            |       |            |                      |                  |  |  |  |  |
| attributes           | <table border="1"> <thead> <tr> <th>Name</th> <th>Type</th> <th>Use</th> <th>Default</th> <th>Fixed</th> <th>Annotation</th> </tr> </thead> <tbody> <tr> <td><a href="#">Type</a></td> <td><b>xs:string</b></td> <td></td> <td></td> <td></td> <td></td> </tr> </tbody> </table> | Name | Type    | Use   | Default    | Fixed | Annotation | <a href="#">Type</a> | <b>xs:string</b> |  |  |  |  |
| Name                 | Type                                                                                                                                                                                                                                                                             | Use  | Default | Fixed | Annotation |       |            |                      |                  |  |  |  |  |
| <a href="#">Type</a> | <b>xs:string</b>                                                                                                                                                                                                                                                                 |      |         |       |            |       |            |                      |                  |  |  |  |  |
| source               | <pre>&lt;xs:element name="Tissue"&gt;   &lt;xs:complexType&gt;     &lt;xs:attribute name="Type" type="xs:string"/&gt;   &lt;/xs:complexType&gt; &lt;/xs:element&gt;</pre>                                                                                                        |      |         |       |            |       |            |                      |                  |  |  |  |  |

attribute DATASET/Grid/Voxel/Tissue/@Type

|      |                  |
|------|------------------|
| type | <b>xs:string</b> |
|------|------------------|

|        |                                                                 |
|--------|-----------------------------------------------------------------|
| source | <code>&lt;xs:attribute name="Type" type="xs:string"/&gt;</code> |
|--------|-----------------------------------------------------------------|

element **DATASET/Grid/Voxel/Spectrum**

|           |                                                                                   |
|-----------|-----------------------------------------------------------------------------------|
| diagram   |  |
| namespace | <code>http://gabrmn.uab.es/jmrui2xml_sv</code>                                    |
| source    | <code>&lt;xs:element name="Spectrum"/&gt;</code>                                  |
